# Supplementary material
Source: PubMed Central journal article supplement (PMC6124420)
Supplement: jciinsight-3-99015-s105.pdf [file jciinsight-3-99015-s105.pdf]

## Supplemental Figures

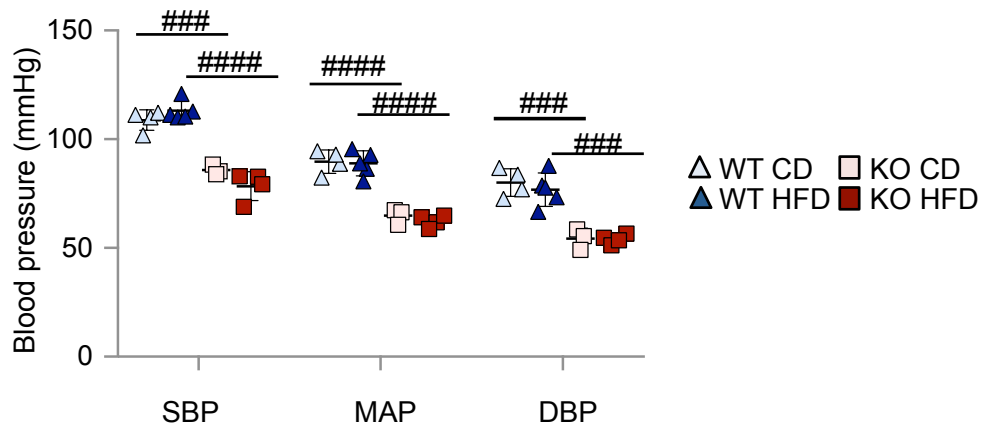

**Figure S1, related to Figures 1 and 3. Effects of 10-week chow diet (CD) or high-fat diet (HFD) feeding on systolic blood pressure (SBP), diastolic blood pressure (DBP) and mean arterial pressure (MAP) of WT and ASKO mice. CD and HFD-fed ASKO mice had lower BP than diet-matched WT mice. HFD feeding did not increase BP in both genotypes. Data presented as mean $\pm$ SD; n=3-5/group; ###  $P < 0.001$ , ####  $P < 0.0001$  by one-way ANOVA followed by Tukey's post hoc test.**

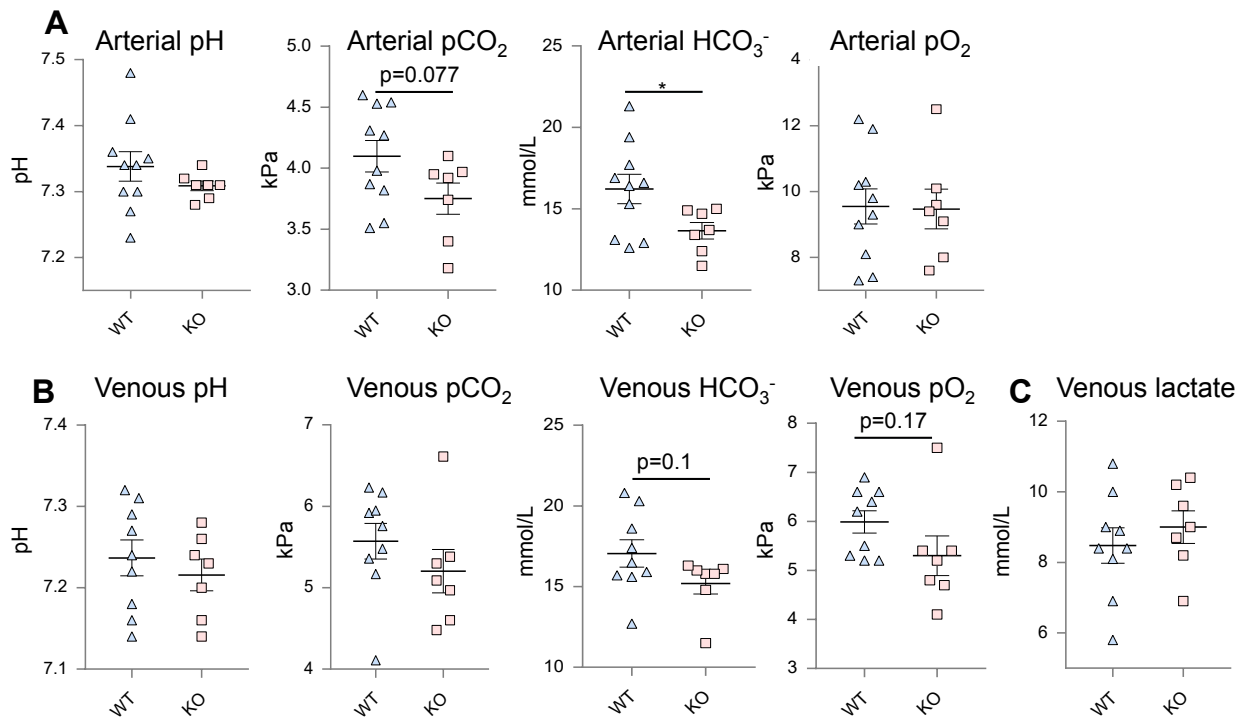

**Figure S2, related to Figure 1. Blood gases of WT and ASKO mice at the age of 5-9 months maintained on chow diet (CD) at 22°C. Lower HCO<sub>3</sub><sup>-</sup> and a trend towards lower pCO<sub>2</sub> and pH of ASKO mice than WT mice suggested that ASKO mice had metabolic acidosis. (A) Arterial blood was sampled from ventral tail artery. (B and C) Venous blood was sampled from superficial temporal vein. All data presented as mean±SEM; n=7-10/group; \*P<0.05 WT versus ASKO by Welch's unpaired t test.**

## A sequential study of influences of salt intake from drinking water and of water restriction on food intake

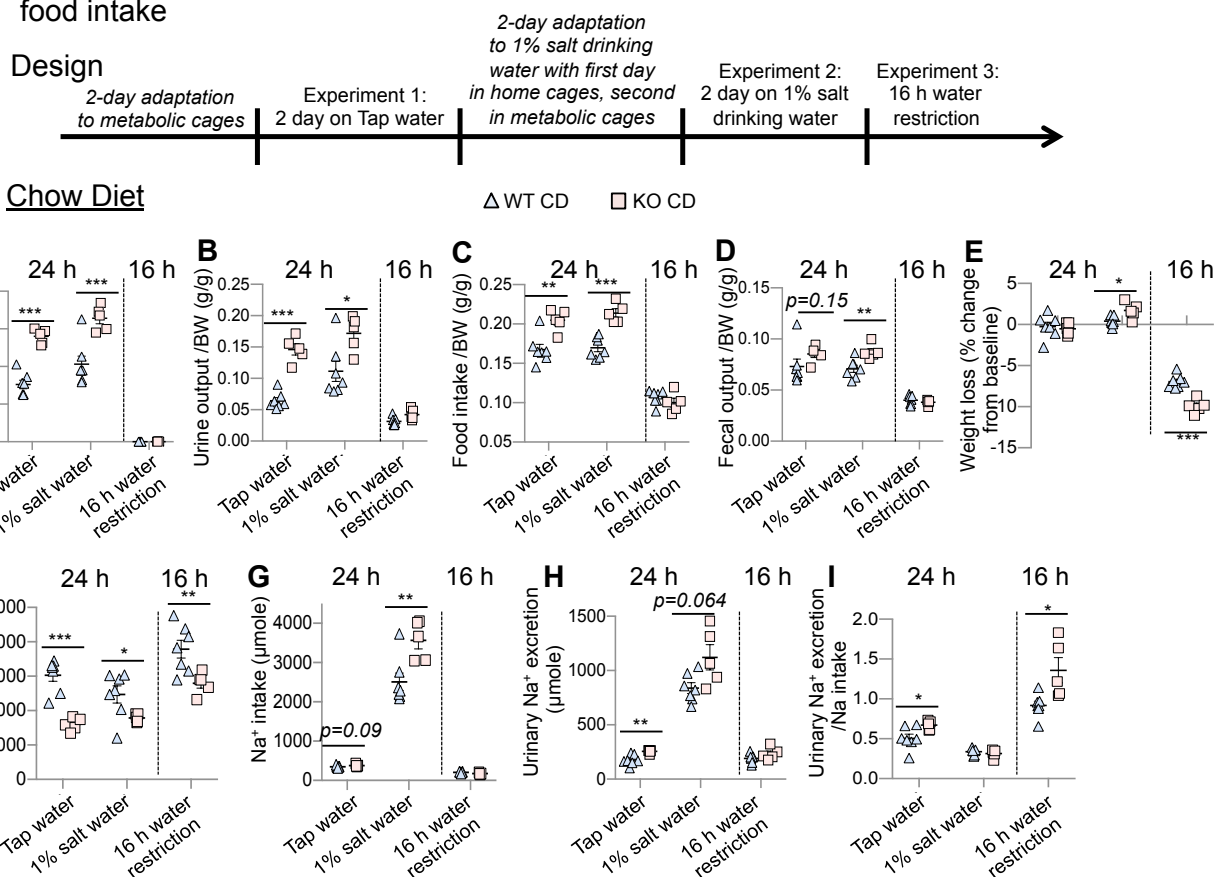

**Figure S3, related to Figure 1. 1% NaCl in drinking water increased fluid and food intake in both genotypes with chow diet (CD) and high-fat diet (HFD) feeding, whereas 16-hour water restriction reduced food consumption in both genotypes and caused a greater weight loss in ASKO mice at 22°C. (A-I) In CD feeding condition, (A) water intake, (B) urine output, (C) food intake, (D) fecal output, (E) weight loss, (F) urine osmolarity, (G) Na<sup>+</sup> intake, (H) urinary Na<sup>+</sup> excretion, and (I) urinary Na<sup>+</sup> excretion/Na<sup>+</sup> intake of CD-fed 2-3.5 month-old mice on tap water (in normal condition) or on 1% NaCl drinking water or challenged with 16-hour water restriction. These experiments were performed in the same CD-fed mice. n=5-7/group. mean±SEM. [S3J-S3R in next page](#)**

# A sequential study of influences of salt intake from drinking water and of water restriction on food intake

## Design

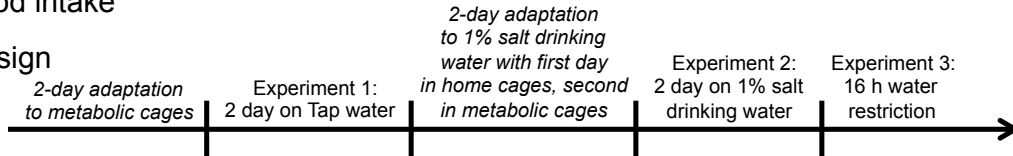

## High Fat Diet

▲ WT HFD ■ KO HFD

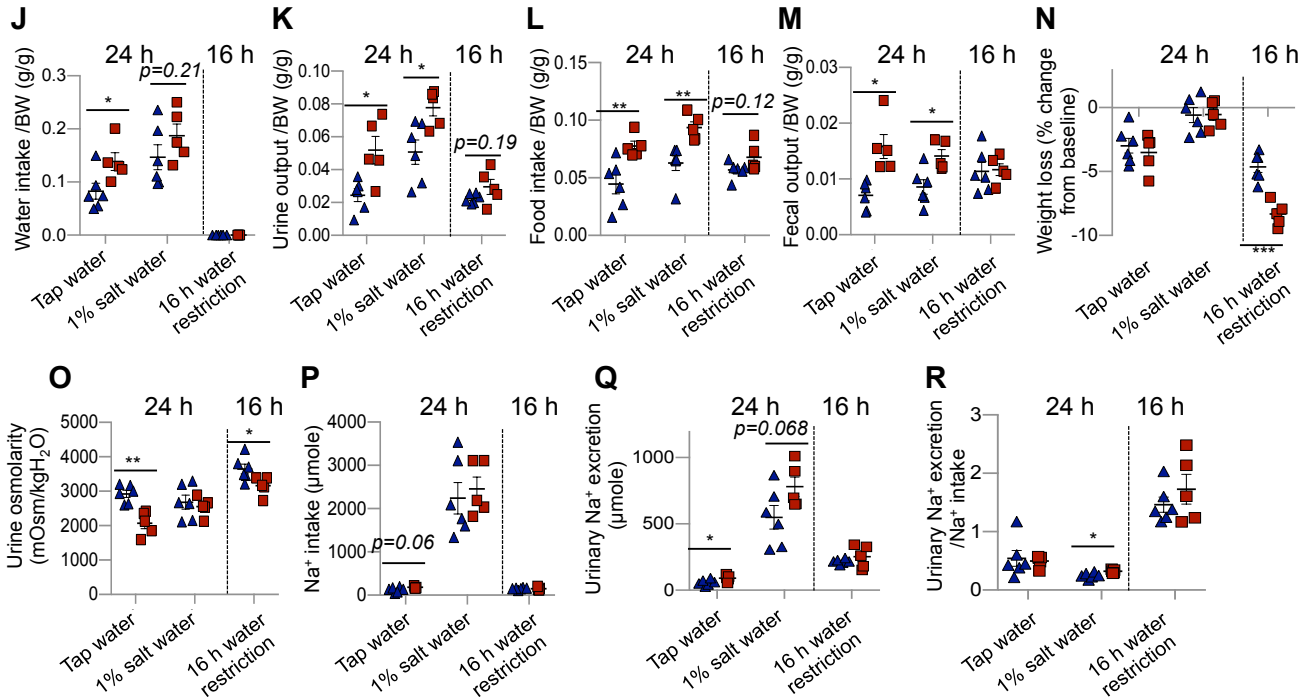

(J-R) In HFD feeding condition, (J) water intake, (K) urine output, (L) food intake, (M) fecal output, (N) weight loss, (O) urine osmolarity, (P) Na<sup>+</sup> intake, (Q) urinary Na<sup>+</sup> excretion, and (R) urinary Na<sup>+</sup> excretion/ Na<sup>+</sup> intake of 9-week HFD-fed mice on tap water (normal condition) or on 1% NaCl drinking water or challenged with 16-hour water restriction. These experiments were performed in the same HFD-fed mice.  $n=5-6$ /group.  $\text{mean} \pm \text{SEM}$ . In all data, \* $P < 0.05$ , \*\* $P < 0.01$  and \*\*\* $P < 0.001$ , WT versus ASKO on tap water or on 1%NaCl drinking water or challenged with 16-hour water restriction by Welch's unpaired t test. Continued S3



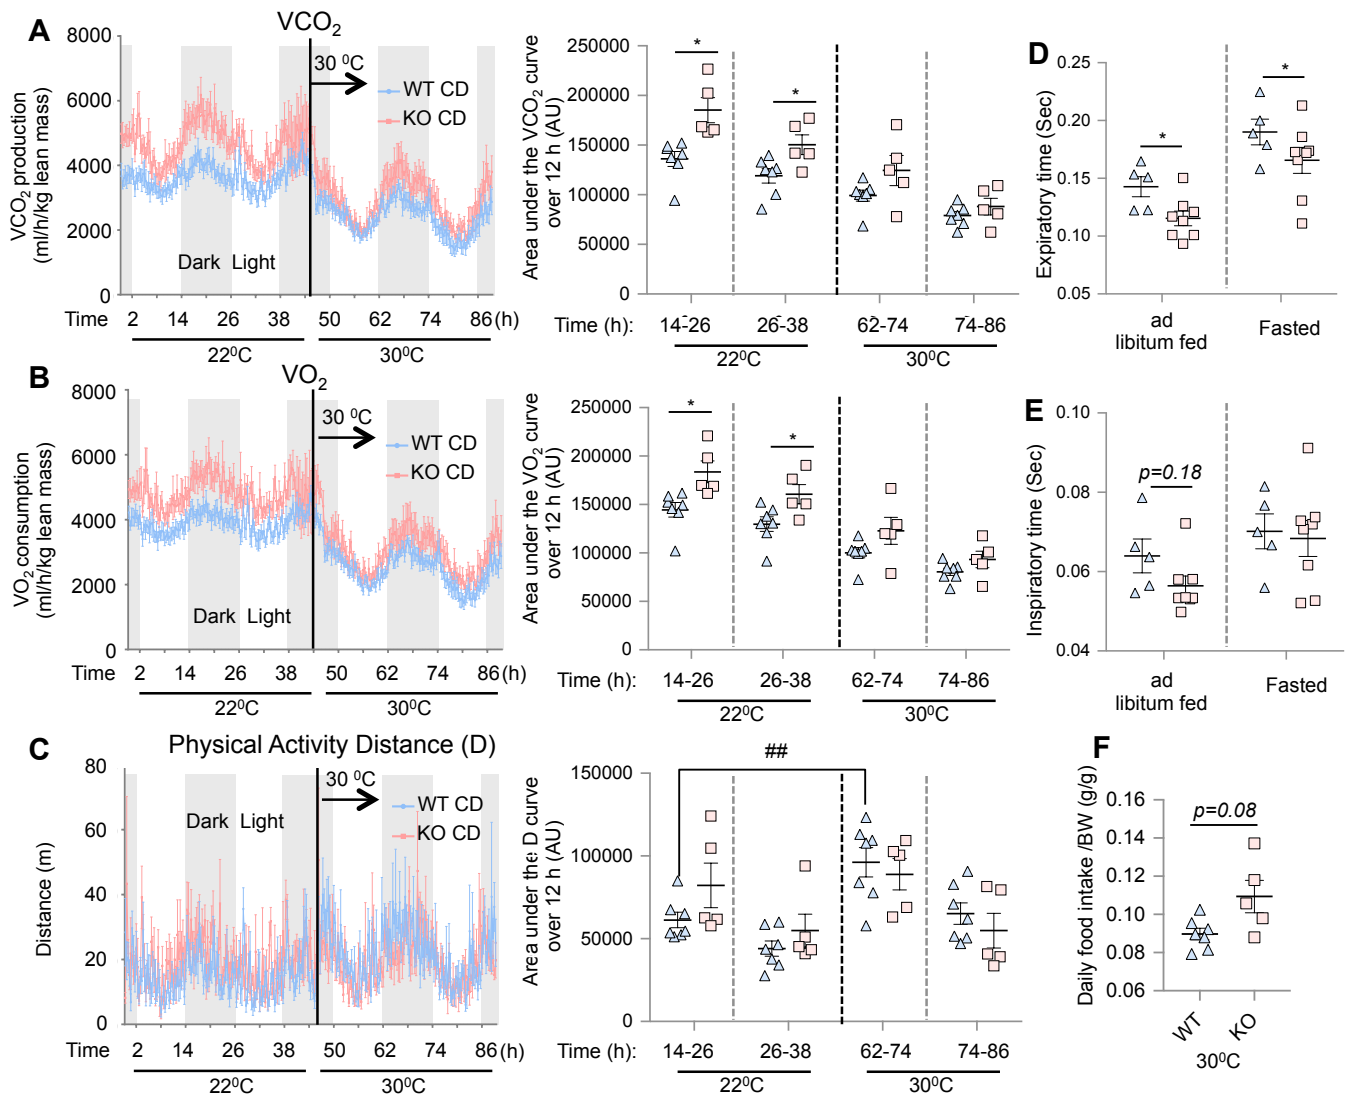

**Figure S4, related to Figure 2. Respiratory parameters of mice fed chow diet (CD). ASKO mice had greater  $CO_2$  production,  $O_2$  consumption, and shorter expiratory time, but were not more active than WT mice at 22°C. 12-15 hours of fasting at 22°C eliminated and thermoneutral housing alleviated these changes. (A-C) Temporal changes of (A)  $CO_2$  production (B)  $O_2$  consumption (C) physical activity of 4-month-old mice at 22°C and 30°C.  $n=5-7$ /group. mean $\pm$ SEM (D-E) (D) Expiratory time (E) inspiratory time per breath in 3 month-old ad libitum fed mice and after 12-15 hours of fasting at 22°C.  $n=5-8$ /group. mean $\pm$ SEM. (F) Food intake of 4-month-old mice at 30°C.  $n=5-7$ /group. mean $\pm$ SEM; In all data, \*  $p<0.05$  WT versus ASKO; ##  $p<0.01$ , WT at 22°C versus WT at 30°C by Welch's unpaired t test.**

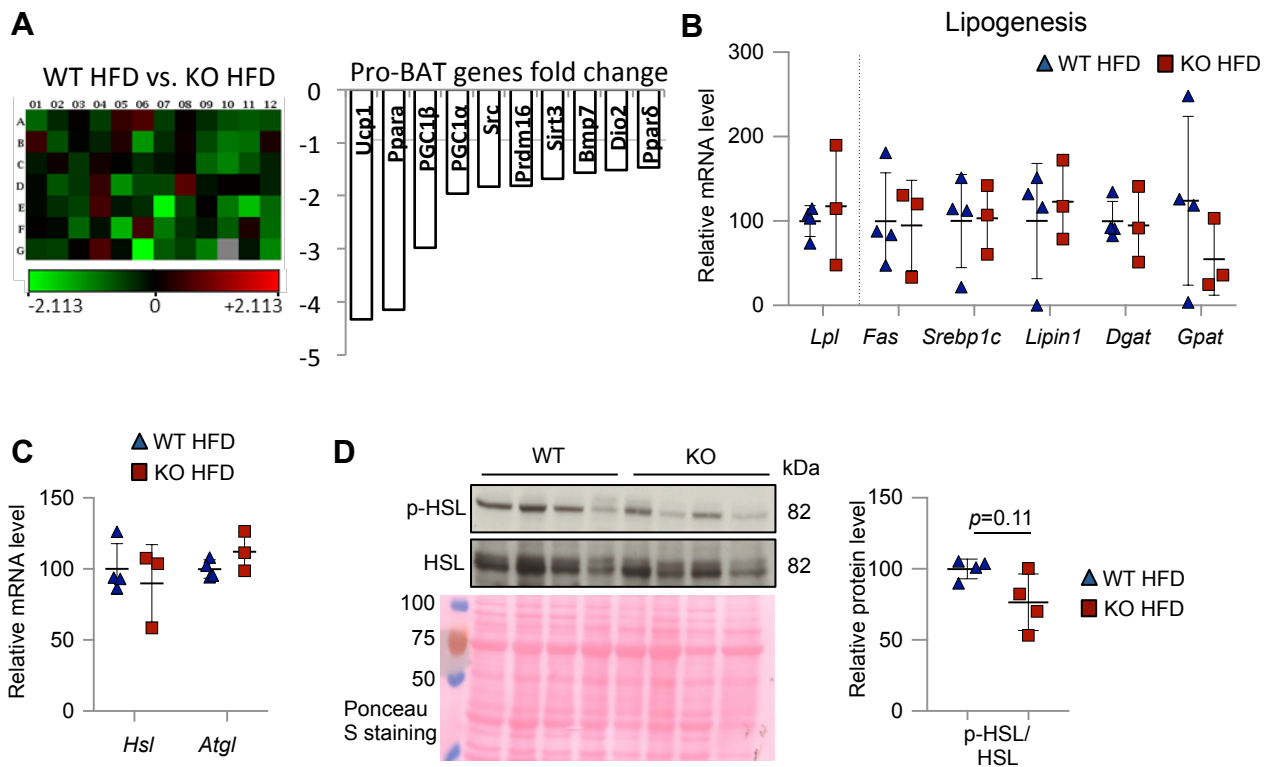

**Figure S5, related to Figure 4. Perirenal fat of ASKO mice had reduced thermogenic reprogramming in response to 14-week high-fat diet (HFD) feeding, which was not related to a reduced sympathetic input. (A)** Heat map of genes involved in adipocyte metabolism and genes differently expressed between the perirenal fat of HFD-fed WT and ASKO mice. (Pooled RNA from 3 mice/group). **(B and C)** mRNA levels of **(B)** lipogenesis genes **(C)** hormone-sensitive lipase (*Hsl*) and adipocyte triglyceride lipase (*Atgl*) in perirenal fat of HFD-fed mice.  $n=3-4$ /group. mean $\pm$ SD. **(D)** Western blot autoradiographic images (left panel) and relative protein levels of p-HSL/HSL (right panel) in perirenal fat of HFD-fed WT and ASKO mice. Ponceau S stained blot is shown for loading controls.  $n=4$ /group. mean $\pm$ SD. S5E-S5H in next page

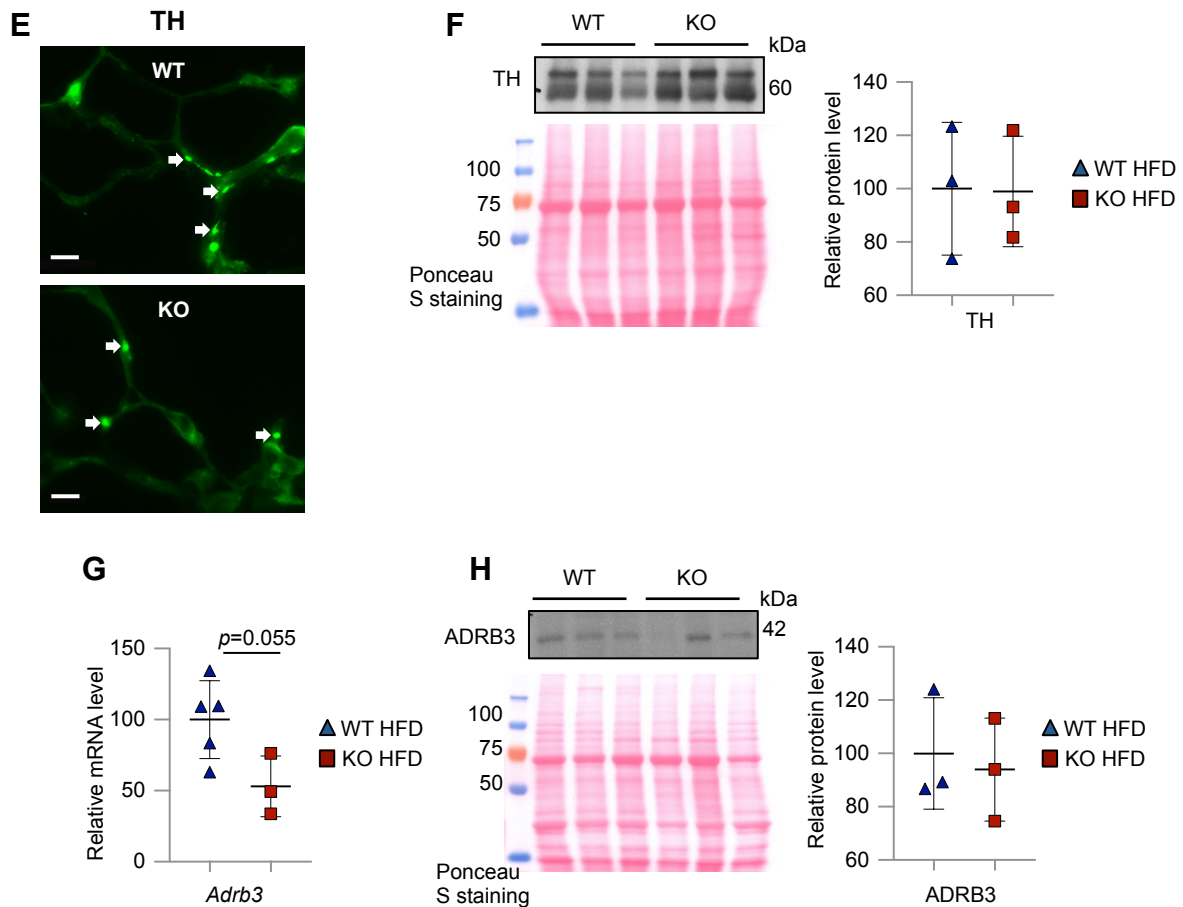

(E) representative digital microphotograph of fluorochrome-labelled tyrosine hydroxylase (TH) protein in perirenal fat of HFD-fed WT and ASKO mice. Scale bar 10  $\mu$ m. n=1/group. Though detectable, immunostaining showed TH protein in the collected perirenal fat specimen was sparsely present, so was it in perirenal fat of chow diet-fed WT mice, compared with that in brown adipose tissue of HFD-fed WT mice. This does not permit a reliable quantification analysis. (F) Western blot analysis of TH in mesenteric fat of HFD-fed WT and ASKO mice (left panel). Protein levels for TH were normalized to Ponceaus S staining (right panel). n=3/group. mean $\pm$ SD. (G) mRNA levels of beta3-adrenergic receptor (*Adrb3*) in perirenal fat of HFD-fed WT and ASKO mice. n=3-5/group. mean $\pm$ SD. (H) Western blot analysis of ADRB 3 in perirenal fat of HFD-fed WT and ASKO mice (left panel). Protein levels for ADRB3 were normalized to Ponceau S staining (right panel). n=3/group. mean $\pm$ SD. All data analyzed by Welch's unpaired t test. Continued S5

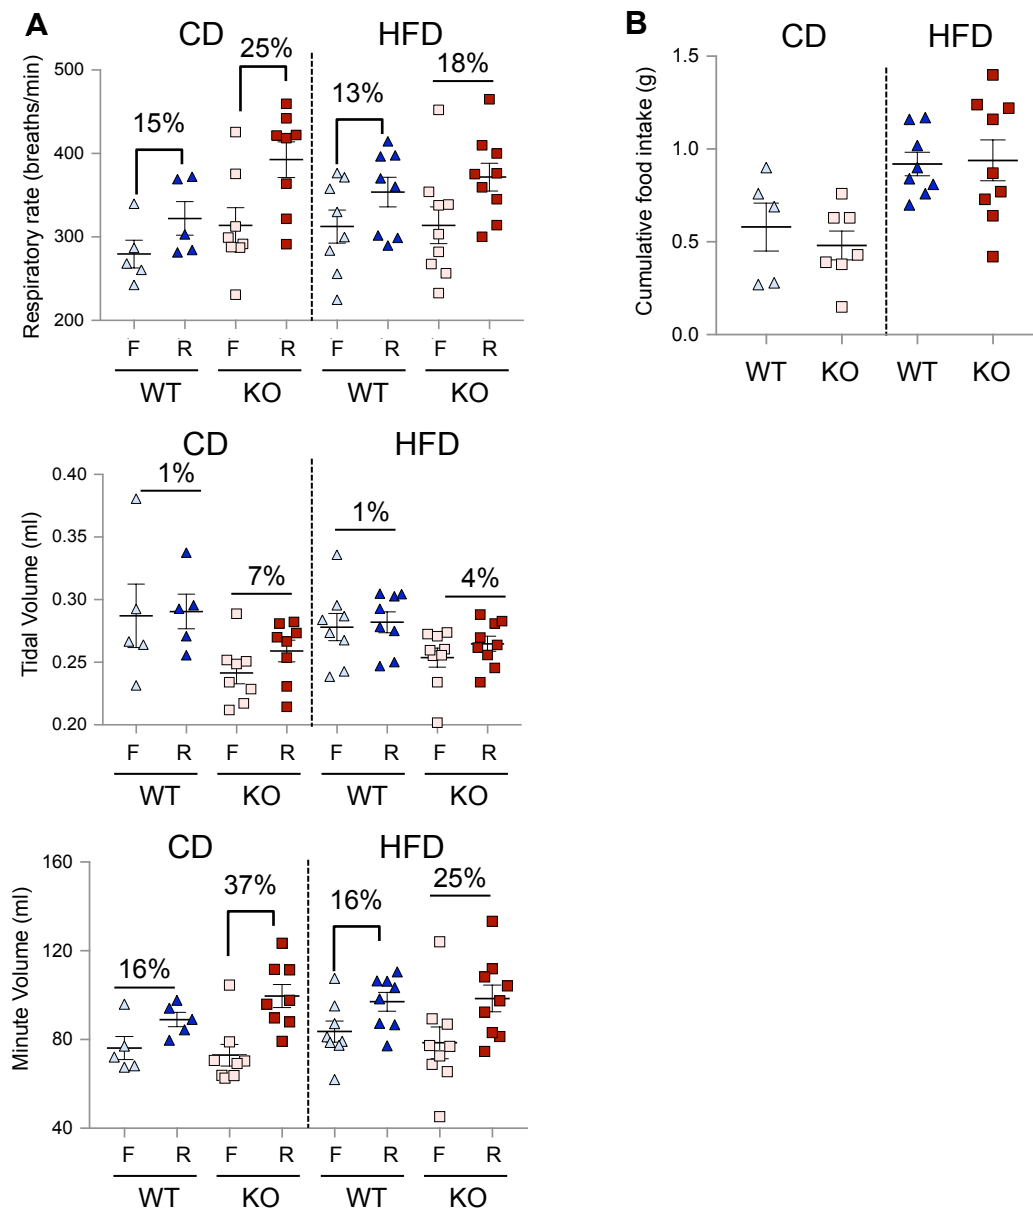

**Figure S6, related to Figure 5. Respiratory burden of chow diet (CD)-fed ASKO mice decreased with the switch to high-fat diet (HFD) feeding. (A)** Respiratory rate, tidal volume and minute volume of mice after 12-15 hours of fasting and in response to 1.5-hour refeeding of CD or HFD (n=5-9/group). F: fasting, R: refeeding. **(B)** 1.5-hour cumulative food intake during refeeding after 12-15 hours of fasting (n=5-9/group). Experiments performed in the same mice, first with CD feeding at the age of 2.5 months, and 1 month later with HFD feeding, but 3 more WT and 1 more 2.5-3 month old ASKO mice were recruited for the HFD experiment. The percentage changes of average mean of each respiratory parameter induced by refeeding are shown on the graphs. All data presented as mean±SEM. Data of 1.5-hour cumulative food intake after refeeding of CD are also shown in Figure 1F.

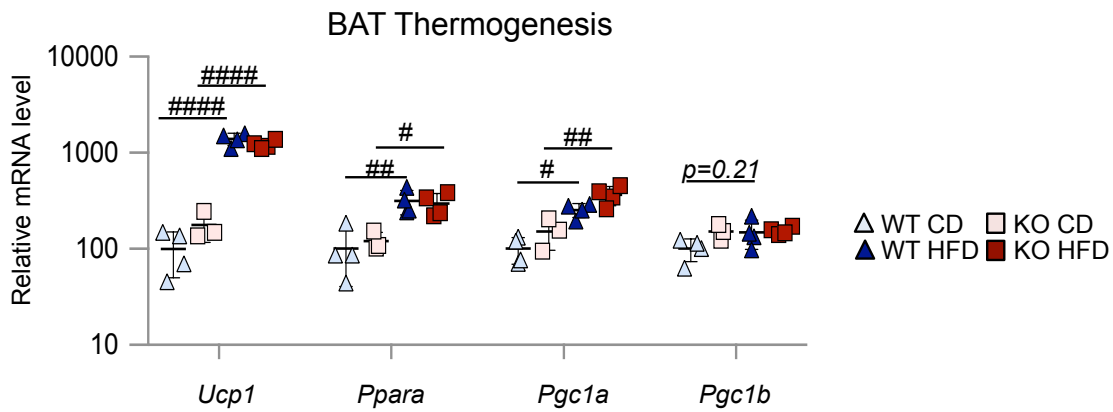

**Figure S7, related to Figure 5. Chronic high-fat diet (HFD) feeding activated brown adipose tissue (BAT) thermogenic reprogramming in both WT and ASKO mice.** Data presented as mean±SD; n=4 per group; # $P < 0.05$ , ## $P < 0.01$ , #### $P < 0.0001$  by one-way ANOVA followed by Tukey's post hoc test.

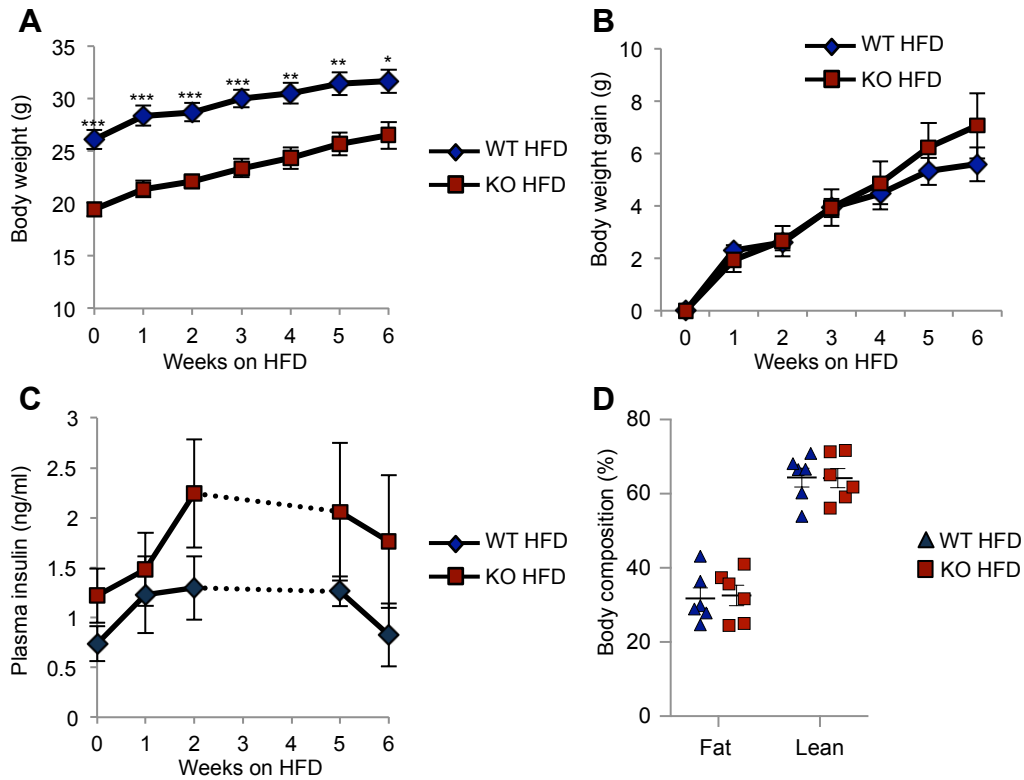

**Figure S8, related to Figure 6. Differential hyperinsulinemic responses of WT and ASKO mice to high-fat diet (HFD). ASKO mice tended to have higher insulin levels than WT mice already after 1 week on HFD. (A and B) BW and BW gain tracked weekly from the beginning of HFD feeding in 9 week-old mice. (C) Corresponding plasma insulin levels. Blood was collected from tail during the dark phase. (D) Body composition in week 6 of HFD feeding. All data presented as mean±SEM; n=6/group; \* $P < 0.05$ , \*\* $P < 0.01$ , \*\*\* $P < 0.001$ , HFD-fed WT versus HFD-fed ASKO by Welch's unpaired t test.**

## Supplemental Tables

**Table S1.** The composition of (A) the chow diet and of (B) the high fat diet used in the experiment. Information as provided by the producers.

**(A) Chow diet (Kliba 3436 Extrudate)**

|                         |                          |  |                    |            |
|-------------------------|--------------------------|--|--------------------|------------|
| Major nutrients         |                          |  | Vitamins           |            |
| Dry matter              | (88.0%)                  |  | • Vitamin A        | 14000IU/kg |
| • Crude protein         | 18.5%                    |  | • Vitamin D3       | 1000IU/kg  |
| • Crude fat             | 4.5%                     |  | • Vitamin E        | 110mg/kg   |
| • Crude fiber           | 4.5%                     |  | • Vitamin K3       | 2mg/kg     |
| • Crude ash             | 6.5%                     |  | • Vitamin B1       | 30mg/kg    |
| • Nitrogen Free Extract | 54.0%                    |  | • Vitamin B2       | 20mg/kg    |
|                         |                          |  | • Vitamin B6       | 14mg/kg    |
| Amino acids             |                          |  | • Vitamin B12      | 0.05mg/kg  |
| • Arginine              | 1.10%                    |  | • Nicotinic acid   | 70mg/kg    |
| • Lysine                | 1.00%                    |  | • Pantothenic acid | 33mg/kg    |
| • Methionine            | 0.39%                    |  | • Folic acid       | 2mg/kg     |
| • Methionine+cystine    | 0.76%                    |  | • Biotin           | 0.22mg/kg  |
| • Tryptophan            | 0.20%                    |  | • Choline          | 2000mg/kg  |
| • Threonine             | 0.65%                    |  | • Vitamin C        | 40mg/kg    |
|                         |                          |  |                    |            |
| Major mineral elements  |                          |  | Trace elements     |            |
| • Calcium               | 1.05%                    |  | • Iron             | 250mg/kg   |
| • Phosphorus            | 0.80%                    |  | • Zinc             | 60mg/kg    |
| • Magnesium             | 0.20%                    |  | • Copper           | 14mg/kg    |
| • Sodium                | 0.20%                    |  | • Iodine           | 1mg/kg     |
| • Potassium             | 0.78%                    |  | • Magnesium        | 60mg/kg    |
| • Chloride              | 0.36%                    |  | • Selenium         | 0.3mg/kg   |
|                         |                          |  |                    |            |
| Energy content          | <b>Calculated values</b> |  |                    |            |
| Protein, % energy       | 22.40                    |  |                    |            |
| Carbohydrate, % energy  | 65.35                    |  |                    |            |
| Fat, % energy           | 12.25                    |  |                    |            |
| Metabolizable energy    | 13.1 MJ/kg               |  |                    |            |
| Gross energy            | 16.1MJ/kg                |  |                    |            |
|                         |                          |  |                    |            |

(B) High fat diet (Research diet D12492)

| <b>Ingredient</b>                    |                          |
|--------------------------------------|--------------------------|
| Casein, 30 Mesh                      | 200gm                    |
| L-Cystine                            | 3gm                      |
| Corn Starch                          | 0gm                      |
| Maltoextrin 10                       | 125gm                    |
| Sucrose                              | 68.8gm                   |
| Cellulose, BW200                     | 50gm                     |
| Soybean Oil                          | 25gm                     |
| Lard                                 | 245gm                    |
| Mineral Mix S10026                   | 10gm                     |
| DiCalcium Phosphate                  | 13gm                     |
| Calcium Carbonate                    | 5.5gm                    |
| Potassium citrate, 1H <sub>2</sub> O | 16.5gm                   |
| Vitamin Mix V10001                   | 10gm                     |
| Choline Bitartrate                   | 2gm                      |
| FD and C Blue Dye #1                 | 0.05gm                   |
|                                      |                          |
| Energy content                       | <b>Calculated values</b> |
| Protein, % <i>energy</i>             | 20                       |
| Carbohydrate, % <i>energy</i>        | 20                       |
| Fat, % <i>energy</i>                 | 60                       |
| Metabolizable energy                 | 21.6 MJ/kg               |
|                                      |                          |

continued Table S1



**Table S2:** Primer sequences used in quantitative RT-PCR experiments.

| <b>Genes</b>   | <b>Forward</b>       | <b>Reverse</b>        |
|----------------|----------------------|-----------------------|
| Cebpa          | GACAAGAACAGCAACGAGTA | AGCTGGCGGAAGATGC      |
| Ppar $\gamma$  | TTCACAAGAGCTGACCCAAT | AAGCCTGATGCTTTATCCCC  |
| Fas            | AAGCGGTCTGGAAAGCTGAA | TCTGAACCACTCACACCCAC  |
| Srebp1         | AGCCACACTTCATCAAGGCA | GTGGATGGGCAGTTTGTCTG  |
| Ucp1           | TTCATCAACTCTCTGCCAGG | GTACAATCCACTGTCTGTCTG |
| Ppara $\alpha$ | AGAGAATCCACGAAGCCTAC | GTGGAAGAATCGGACCTCTG  |
| Pgc1 $\alpha$  | CGAGGACACGAGGAAAGGAA | CACTGGCCTGAATCTGTGGA  |
| Pgc1 $\beta$   | CACGGTTTTATCACCTTCCG | ATGGCTTCGTACTTGCTTTT  |
| Mcad           | AGCCAATGATGTGTGCTTAC | GGCTTTACTAGCGGGTACTT  |
| Ecah           | GTCAATGCCATCAGTCCAAC | GGCTTCTGGTATCGCTGTAT  |
| Hcad           | TTCGTGACCAGGCAATTCTT | CCCTTCTTGGATTTTGCCAG  |
| Acaa           | GGGAATATTTCTTCCCGCCT | GTTGTCACAGGCACAATCTC  |
| Adrb3          | GGTAATCATAGCCATCGCC  | TAGCAGTTACACAGAGCACG  |
| Atgl           | CAACGCCACTCACATCTACG | CAGCAGGCAGGGTCTTTAGT  |
| Hsl            | ATGGCATCAACCACTGTGAG | GCCAGGCTGTTGAGTACCTT  |
| Tfam           | CCCCTCGTCTATCAGTCTTG | TTTGCATCTGGGTGTTTAGC  |
| Nrf1           | TGTAGCCACGTACACTGAGC | GAGGCCGTTTCCGTTTCTTC  |
| Nrf2           | GGAAGTGTCAAACAGAACGG | GGCTTTTTGATGACCAGGAC  |
| Gapdh          | CCATCACCATCTTCCAGGAG | TCCATGGTGGTGAAGACAC   |

**Table S3:** Antibodies origin and dilution used.

| <b>Primary Ab</b>                       | <b>Manufacturer catalog #</b> | <b>Host species</b> | <b>Dilution for IB</b> | <b>Dilution for IF</b> |
|-----------------------------------------|-------------------------------|---------------------|------------------------|------------------------|
| Hormone Sensitive Lipase (HSL)          | Cell Signaling #4107          | Rabbit              | 1/250                  |                        |
| phospho-Hormone Sensitive Lipase (pHSL) | Cell Signaling #4126          | Rabbit              | 1/500                  |                        |
| Adipose triglyceride lipase (ATGL)      | Cell Signaling #2138          | Rabbit              | 1/500                  |                        |
| Tyrosine hydroxylase (TH)               | Sigma-Aldrich #T1299          | Mouse               | 1/1000                 | 1/200                  |
| Adrenergic receptor $\beta$ 3 (ADRB3)   | Novusbio #NBP1-00716          | Rabbit              | 1/250                  |                        |
| $\beta$ -Actin                          | Cell Signaling #3700          | Mouse               | 1/2000                 |                        |

  

| <b>Secondary Ab</b>   | <b>Manufacturer catalog #</b>                    | <b>Host species</b> | <b>Dilution for IB</b> | <b>Dilution for IF</b> |
|-----------------------|--------------------------------------------------|---------------------|------------------------|------------------------|
| Rabbit IgG, HRP       | GE Healthcare Europe GmbH #NA934                 | Donkey              | 1/25000                |                        |
| Mouse IgG, HRP        | Jackson ImmunoResearch Laboratories #115-035-166 | Goat                | 1/50000                |                        |
| Mouse, AlexaFluor 488 | Invitrogen #A-11029                              | Goat                |                        | 1/300                  |

IF: Immunofluorescence; HRP: Horseradish peroxidase

**Table S4:** Real-time PCR array of genes involved in adipogenesis and adipocyte function.

| Well | Gene Symbol | Fold Regulation<br>( $2^{(-\Delta\Delta Ct)}$ ) |
|------|-------------|-------------------------------------------------|
| A01  | Acacb       | -1.78                                           |
| A02  | Adipoq      | -1.26                                           |
| A03  | Adrb2       | 1.02                                            |
| A04  | Agt         | -1.41                                           |
| A05  | Angpt2      | 1.35                                            |
| A06  | Axin1       | 1.54                                            |
| A07  | Bmp2        | -1.41                                           |
| A08  | Bmp4        | 1.04                                            |
| A09  | Bmp7        | -1.29                                           |
| A10  | Ccnd1       | -1.56                                           |
| A11  | Cdk4        | -1.66                                           |
| A12  | Cdkn1a      | -1.54                                           |
| B01  | Cdkn1b      | 1.38                                            |
| B02  | Cebpa       | -1.57                                           |
| B03  | Cebpb       | -1.02                                           |
| B04  | Cebpd       | -1.22                                           |
| B05  | Cfd         | 1.2                                             |
| B06  | Creb1       | -2.37                                           |
| B07  | Ddit3       | -1.28                                           |
| B08  | Dio2        | 1.07                                            |
| B09  | Dkk1        | -1.51                                           |
| B10  | DIK1        | -1.96                                           |
| B11  | E2f1        | -1.86                                           |
| B12  | Egr2        | 1.15                                            |
| C01  | Fabp4       | -1.14                                           |
| C02  | Fasn        | 1.08                                            |
| C03  | Fgf1        | -1.34                                           |
| C04  | Fgf10       | 1.12                                            |
| C05  | Fgf2        | -1.02                                           |
| C06  | Fos         | -1.28                                           |
| C07  | Foxc2       | -1.1                                            |
| C08  | Gata2       | 1.03                                            |
| C09  | Gata3       | -1.78                                           |
| C10  | Hes1        | -2.13                                           |
| C11  | Insr        | -1.58                                           |
| C12  | Irs1        | -1.2                                            |
| D01  | Irs2        | -1.04                                           |
| D02  | Jun         | -1.62                                           |
| D03  | Klf15       | -1.34                                           |
| D04  | Klf2        | 1.34                                            |
| D05  | Klf3        | -2.25                                           |
| D06  | Klf4        | -1.5                                            |
| D07  | Lep         | -1.48                                           |
| D08  | Lipe        | 1.63                                            |
| D09  | Lmna        | -1.11                                           |
| D10  | Lpl         | 1.03                                            |

|     |        |      |
|-----|--------|------|
| D11 | Lrp5   | 1.02 |
| D12 | Mapk14 | -1.2 |

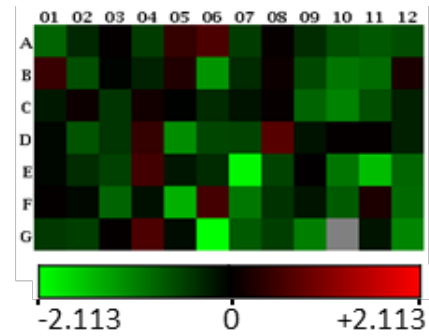

|     |          |       |
|-----|----------|-------|
| E01 | Ncoa2    | -1.03 |
| E02 | Ncor1    | -1.29 |
| E03 | Ncor2    | -1.45 |
| E04 | Nr0b2    | 1.46  |
| E05 | Nr1h3    | -1.14 |
| E06 | Nrf1     | -1.27 |
| E07 | Ppara    | -4.15 |
| E08 | Ppard    | -1.47 |
| E09 | Pparg    | 1.01  |
| E10 | Ppargc1a | -1.96 |
| E11 | Ppargc1b | -2.97 |
| E12 | Rb1      | -1.81 |
| F01 | Retn     | 1.03  |
| F02 | Runx1t1  | -1.05 |
| F03 | Rxra     | -1.78 |
| F04 | Sfrp1    | -1.1  |
| F05 | Sfrp5    | -1.79 |
| F06 | Shh      | 1.47  |
| F07 | Sirt1    | -1.99 |
| F08 | Sirt2    | -1.33 |
| F09 | Sirt3    | -1.12 |
| F10 | Slc2a4   | -1.69 |
| F11 | Src      | 1.17  |
| F12 | Srebf1   | -1.83 |
| G01 | Stat5a   | -1.38 |
| G02 | Taz      | -1.43 |
| G03 | Tcf7l2   | 1.03  |
| G04 | Tsc22d3  | 1.56  |
| G05 | Twist1   | -1.07 |
| G06 | Ucp1     | -4.33 |
| G07 | Vdr      | -1.67 |
| G08 | Wnt1     | -1.43 |
| G09 | Wnt10b   | -1.96 |
| G10 | Wnt3a    | -1.29 |
| G11 | Wnt5a    | -1.13 |
| G12 | Wnt5b    | -1.95 |
| H01 | Actb     | -1.17 |
| H02 | B2m      | 1.1   |
| H03 | Hprt1    | 1.12  |
| H04 | Ldha     | 1.18  |
| H05 | Rplp1    | -1.24 |
